# Supplementary material for: Concealed Inherited Cardiomyopathies Detected in Cardio-Oncology Screening
Source: MDPI journal article supplement (doi:10.3390/jcm13010002), 2023-12-19
Supplement: s1 [file s1]

**Supplementary Table S1.** NGS-Cardiovascular gene panel sequenced for all inherited cardiovascular conditions at our institution.

| Gene            | Chromosome | Num. Amplicons | TotalBases | Covered Bases | Missed Bases | Overall Coverage (%) |
|-----------------|------------|----------------|------------|---------------|--------------|----------------------|
| <i>ABCC8</i>    | chr11      | 47             | 5139       | 5139          | 0            | 100                  |
| <i>ABCC9</i>    | chr12      | 44             | 5178       | 5178          | 0            | 100                  |
| <i>ACTA2</i>    | chr10      | 8              | 1214       | 1214          | 0            | 100                  |
| <i>ACTC1</i>    | chr15      | 8              | 1194       | 1194          | 0            | 100                  |
| <i>ACTN2</i>    | chr1       | 28             | 3112       | 3112          | 0            | 100                  |
| <i>ACVRL1</i>   | chr12      | 14             | 1602       | 1602          | 0            | 100                  |
| <i>AKAP9</i>    | chr7       | 90             | 12224      | 12224         | 0            | 100                  |
| <i>ANK2</i>     | chr4       | 93             | 12411      | 12411         | 0            | 100                  |
| <i>ANKRD1</i>   | chr10      | 9              | 1050       | 1050          | 0            | 100                  |
| <i>APOB</i>     | chr2       | 85             | 13982      | 13982         | 0            | 100                  |
| <i>APOE</i>     | chr19      | 11             | 1232       | 1232          | 0            | 100                  |
| <i>APPL1</i>    | chr3       | 34             | 3230       | 3230          | 0            | 100                  |
| <i>B3GAT3</i>   | chr11      | 13             | 1474       | 1471          | 3            | 99.8                 |
| <i>BAG3</i>     | chr10      | 12             | 1768       | 1768          | 0            | 100                  |
| <i>BGN</i>      | chrX       | 12             | 1457       | 1457          | 0            | 100                  |
| <i>BLK</i>      | chr8       | 21             | 2118       | 2118          | 0            | 100                  |
| <i>BMP10</i>    | chr2       | 9              | 1375       | 1375          | 0            | 100                  |
| <i>BMPRI1A</i>  | chr10      | 13             | 1709       | 1709          | 0            | 100                  |
| <i>BMPRI1B</i>  | chr4       | 13             | 1709       | 1709          | 0            | 100                  |
| <i>BMPR2</i>    | chr2       | 25             | 3247       | 3247          | 0            | 100                  |
| <i>BRAF</i>     | chr7       | 23             | 2481       | 2481          | 0            | 100                  |
| <i>CACNA1C</i>  | chr12      | 64             | 7626       | 7626          | 0            | 100                  |
| <i>CACNA1D</i>  | chr3       | 64             | 7150       | 7150          | 0            | 100                  |
| <i>CACNA2D1</i> | chr7       | 51             | 5327       | 5327          | 0            | 100                  |
| <i>CACNB2</i>   | chr10      | 26             | 3269       | 3269          | 0            | 100                  |
| <i>CALM1</i>    | chr14      | 7              | 690        | 690           | 0            | 100                  |
| <i>CALM2</i>    | chr2       | 7              | 664        | 664           | 0            | 100                  |
| <i>CALM3</i>    | chr19      | 8              | 750        | 750           | 0            | 100                  |
| <i>CALR3</i>    | chr19      | 14             | 1605       | 1574          | 31           | 98.07                |
| <i>CASQ2</i>    | chr1       | 13             | 1750       | 1750          | 0            | 100                  |
| <i>CAV1</i>     | chr7       | 6              | 687        | 687           | 0            | 100                  |
| <i>CAV3</i>     | chr3       | 4              | 476        | 476           | 0            | 100                  |
| <i>CBL</i>      | chr11      | 23             | 2881       | 2881          | 0            | 100                  |
| <i>CBS</i>      | chr21      | 21             | 1806       | 1806          | 0            | 100                  |
| <i>CHRM2</i>    | chr7       | 8              | 1451       | 1451          | 0            | 100                  |
| <i>CHST14</i>   | chr15      | 7              | 1181       | 1181          | 0            | 100                  |
| <i>COL1A1</i>   | chr17      | 56             | 4905       | 4905          | 0            | 100                  |
| <i>COL1A2</i>   | chr7       | 55             | 4621       | 4621          | 0            | 100                  |
| <i>COL3A1</i>   | chr2       | 57             | 4911       | 4911          | 0            | 100                  |
| <i>COL5A1</i>   | chr9       | 78             | 6256       | 6256          | 0            | 100                  |
| <i>COL5A2</i>   | chr2       | 64             | 7200       | 7200          | 0            | 100                  |

|                |       |     |       |       |    |       |
|----------------|-------|-----|-------|-------|----|-------|
| <i>CRYAB</i>   | chr11 | 5   | 678   | 678   | 0  | 100   |
| <i>CSRP3</i>   | chr11 | 6   | 635   | 635   | 0  | 100   |
| <i>CTNNA3</i>  | chr10 | 29  | 3758  | 3758  | 0  | 100   |
| <i>CTNNB1</i>  | chr3  | 19  | 2486  | 2486  | 0  | 100   |
| <i>DES</i>     | chr2  | 15  | 1503  | 1503  | 0  | 100   |
| <i>DMD</i>     | chrX  | 106 | 12161 | 12161 | 0  | 100   |
| <i>DNAJC19</i> | chr3  | 6   | 411   | 411   | 0  | 100   |
| <i>DOLK</i>    | chr9  | 9   | 1667  | 1667  | 0  | 100   |
| <i>DSC2</i>    | chr18 | 25  | 2912  | 2912  | 0  | 100   |
| <i>DSG2</i>    | chr18 | 28  | 3507  | 3507  | 0  | 100   |
| <i>DSP</i>     | chr6  | 57  | 8856  | 8856  | 0  | 100   |
| <i>DTNA</i>    | chr18 | 29  | 3795  | 3795  | 0  | 100   |
| <i>EIF2AK3</i> | chr2  | 32  | 4201  | 4201  | 0  | 100   |
| <i>EIF2AK4</i> | chr15 | 51  | 6900  | 6900  | 0  | 100   |
| <i>ELN</i>     | chr7  | 37  | 4094  | 4094  | 0  | 100   |
| <i>EMD</i>     | chrX  | 9   | 1005  | 1005  | 0  | 100   |
| <i>ENG</i>     | chr9  | 22  | 2753  | 2753  | 0  | 100   |
| <i>EYA4</i>    | chr6  | 26  | 3039  | 3039  | 0  | 100   |
| <i>FBN1</i>    | chr15 | 73  | 9266  | 9266  | 0  | 100   |
| <i>FBN2</i>    | chr5  | 88  | 9389  | 9389  | 0  | 100   |
| <i>FHL1</i>    | chrX  | 11  | 1472  | 1466  | 6  | 99.59 |
| <i>FHOD3</i>   | chr18 | 48  | 6319  | 6319  | 0  | 100   |
| <i>FKRP</i>    | chr19 | 11  | 1498  | 1498  | 0  | 100   |
| <i>FKTN</i>    | chr9  | 13  | 1509  | 1509  | 0  | 100   |
| <i>FLNA</i>    | chrX  | 76  | 10294 | 10294 | 0  | 100   |
| <i>FLNC</i>    | chr7  | 75  | 8658  | 8658  | 0  | 100   |
| <i>GAA</i>     | chr17 | 27  | 3049  | 3049  | 0  | 100   |
| <i>GATA4</i>   | chr8  | 12  | 1392  | 1392  | 0  | 100   |
| <i>GATA5</i>   | chr20 | 12  | 1494  | 1494  | 0  | 100   |
| <i>GATAD1</i>  | chr7  | 9   | 1060  | 1060  | 0  | 100   |
| <i>GCK</i>     | chr7  | 17  | 1608  | 1608  | 0  | 100   |
| <i>GDF2</i>    | chr10 | 7   | 1390  | 1390  | 0  | 100   |
| <i>GLA</i>     | chrX  | 10  | 1360  | 1360  | 0  | 100   |
| <i>GLIS3</i>   | chr9  | 22  | 3293  | 3293  | 0  | 100   |
| <i>GPDL1</i>   | chr3  | 11  | 1376  | 1376  | 0  | 100   |
| <i>HCN4</i>    | chr15 | 28  | 4012  | 4012  | 0  | 100   |
| <i>HFE</i>     | chr6  | 9   | 1125  | 1107  | 18 | 98.4  |
| <i>HNF1A</i>   | chr12 | 16  | 2017  | 2017  | 0  | 100   |
| <i>HNF1B</i>   | chr17 | 16  | 1856  | 1856  | 0  | 100   |
| <i>HNF4A</i>   | chr20 | 20  | 1860  | 1860  | 0  | 100   |
| <i>HRAS</i>    | chr11 | 5   | 683   | 683   | 0  | 100   |
| <i>ILK</i>     | chr11 | 14  | 1959  | 1959  | 0  | 100   |
| <i>INS</i>     | chr11 | 3   | 433   | 433   | 0  | 100   |
| <i>JAG1</i>    | chr20 | 35  | 3917  | 3917  | 0  | 100   |
| <i>JPH2</i>    | chr20 | 17  | 2402  | 2402  | 0  | 100   |

|                |       |    |      |      |   |       |
|----------------|-------|----|------|------|---|-------|
| <i>JUP</i>     | chr17 | 21 | 2368 | 2368 | 0 | 100   |
| <i>KCNA5</i>   | chr12 | 11 | 1892 | 1892 | 0 | 100   |
| <i>KCND2</i>   | chr7  | 15 | 2193 | 2193 | 0 | 100   |
| <i>KCND3</i>   | chr1  | 17 | 2318 | 2318 | 0 | 100   |
| <i>KCNE1</i>   | chr21 | 2  | 400  | 400  | 0 | 100   |
| <i>KCNE2</i>   | chr21 | 2  | 382  | 382  | 0 | 100   |
| <i>KCNE3</i>   | chr11 | 2  | 362  | 362  | 0 | 100   |
| <i>KCNE5</i>   | chrX  | 3  | 479  | 479  | 0 | 100   |
| <i>KCNH2</i>   | chr7  | 28 | 4017 | 4017 | 0 | 100   |
| <i>KCNJ11</i>  | chr11 | 6  | 1183 | 1183 | 0 | 100   |
| <i>KCNJ2</i>   | chr17 | 8  | 1294 | 1294 | 0 | 100   |
| <i>KCNJ5</i>   | chr11 | 9  | 1340 | 1340 | 0 | 100   |
| <i>KCNJ8</i>   | chr12 | 8  | 1375 | 1375 | 0 | 100   |
| <i>KCNK3</i>   | chr2  | 9  | 1285 | 1285 | 0 | 100   |
| <i>KCNQ1</i>   | chr11 | 20 | 2206 | 2206 | 0 | 100   |
| <i>KLF11</i>   | chr2  | 11 | 1739 | 1739 | 0 | 100   |
| <i>KRAS</i>    | chr12 | 6  | 737  | 737  | 0 | 100   |
| <i>LAMA4</i>   | chr6  | 55 | 7540 | 7540 | 0 | 100   |
| <i>LAMP2</i>   | chrX  | 15 | 1626 | 1626 | 0 | 100   |
| <i>LDB3</i>    | chr10 | 24 | 2668 | 2664 | 4 | 99.85 |
| <i>LDLR</i>    | chr19 | 21 | 2763 | 2763 | 0 | 100   |
| <i>LDLRAP1</i> | chr1  | 14 | 1377 | 1377 | 0 | 100   |
| <i>LIPA</i>    | chr10 | 14 | 1650 | 1650 | 0 | 100   |
| <i>LMNA</i>    | chr1  | 18 | 2369 | 2369 | 0 | 100   |
| <i>LOX</i>     | chr5  | 13 | 1604 | 1604 | 0 | 100   |
| <i>LZTR1</i>   | chr22 | 29 | 2733 | 2733 | 0 | 100   |
| <i>MAP2K1</i>  | chr15 | 12 | 1292 | 1292 | 0 | 100   |
| <i>MAP2K2</i>  | chr19 | 13 | 1313 | 1313 | 0 | 100   |
| <i>MAT2A</i>   | chr2  | 11 | 1638 | 1638 | 0 | 100   |
| <i>MED12</i>   | chrX  | 59 | 6984 | 6984 | 0 | 100   |
| <i>MFAP5</i>   | chr12 | 9  | 972  | 972  | 0 | 100   |
| <i>MIB1</i>    | chr18 | 36 | 4071 | 4071 | 0 | 100   |
| <i>MURC</i>    | chr9  | 7  | 1195 | 1195 | 0 | 100   |
| <i>MYBPC3</i>  | chr11 | 35 | 4155 | 4155 | 0 | 100   |
| <i>MYH11</i>   | chr16 | 51 | 6391 | 6391 | 0 | 100   |
| <i>MYH6</i>    | chr14 | 51 | 6190 | 6190 | 0 | 100   |
| <i>MYH7</i>    | chr14 | 45 | 6188 | 6188 | 0 | 100   |
| <i>MYL2</i>    | chr12 | 7  | 571  | 571  | 0 | 100   |
| <i>MYL3</i>    | chr3  | 6  | 648  | 648  | 0 | 100   |
| <i>MYLK</i>    | chr3  | 41 | 6055 | 6055 | 0 | 100   |
| <i>MYLK2</i>   | chr20 | 21 | 2391 | 2391 | 0 | 100   |
| <i>MYOZ2</i>   | chr4  | 8  | 1045 | 1045 | 0 | 100   |
| <i>MYPN</i>    | chr10 | 36 | 4983 | 4983 | 0 | 100   |
| <i>NEBL</i>    | chr10 | 38 | 5002 | 5002 | 0 | 100   |
| <i>NEUROD1</i> | chr2  | 6  | 1121 | 1121 | 0 | 100   |

|                |       |     |       |       |    |       |
|----------------|-------|-----|-------|-------|----|-------|
| <i>NEXN</i>    | chr1  | 21  | 2628  | 2628  | 0  | 100   |
| <i>NF1</i>     | chr17 | 74  | 9161  | 9161  | 0  | 100   |
| <i>NKX2-5</i>  | chr5  | 9   | 1142  | 1142  | 0  | 100   |
| <i>NNT</i>     | chr5  | 37  | 4311  | 4306  | 5  | 99.88 |
| <i>NOTCH1</i>  | chr9  | 63  | 8008  | 7987  | 21 | 99.74 |
| <i>NOTCH3</i>  | chr19 | 51  | 7296  | 7296  | 0  | 100   |
| <i>NPPA</i>    | chr1  | 4   | 486   | 486   | 0  | 100   |
| <i>NRAS</i>    | chr1  | 5   | 610   | 610   | 0  | 100   |
| <i>PAX4</i>    | chr7  | 10  | 1482  | 1482  | 0  | 100   |
| <i>PAX6</i>    | chr11 | 13  | 2035  | 2035  | 0  | 100   |
| <i>PCSK9</i>   | chr1  | 16  | 2199  | 2199  | 0  | 100   |
| <i>PDLIM3</i>  | chr4  | 13  | 1733  | 1733  | 0  | 100   |
| <i>PDX1</i>    | chr13 | 7   | 952   | 952   | 0  | 100   |
| <i>PKP2</i>    | chr12 | 21  | 2786  | 2786  | 0  | 100   |
| <i>PLN</i>     | chr6  | 1   | 169   | 169   | 0  | 100   |
| <i>PLOD1</i>   | chr1  | 28  | 3325  | 3325  | 0  | 100   |
| <i>PPARG</i>   | chr3  | 12  | 1588  | 1588  | 0  | 100   |
| <i>PRDM16</i>  | chr1  | 37  | 4681  | 4654  | 27 | 99.42 |
| <i>PRKAG2</i>  | chr7  | 19  | 1974  | 1974  | 0  | 100   |
| <i>PRKG1</i>   | chr10 | 26  | 3087  | 3087  | 0  | 100   |
| <i>PSEN1</i>   | chr14 | 12  | 1504  | 1504  | 0  | 100   |
| <i>PSEN2</i>   | chr1  | 15  | 1447  | 1447  | 0  | 100   |
| <i>PTPN11</i>  | chr12 | 16  | 1936  | 1936  | 0  | 100   |
| <i>RAF1</i>    | chr3  | 18  | 2107  | 2107  | 0  | 100   |
| <i>RASA1</i>   | chr5  | 39  | 3412  | 3411  | 1  | 99.97 |
| <i>RASA2</i>   | chr3  | 38  | 3815  | 3793  | 22 | 99.42 |
| <i>RBM20</i>   | chr10 | 27  | 3824  | 3817  | 7  | 99.82 |
| <i>RIT1</i>    | chr1  | 8   | 771   | 771   | 0  | 100   |
| <i>RYR2</i>    | chr1  | 134 | 15954 | 15954 | 0  | 100   |
| <i>SCN10A</i>  | chr3  | 49  | 7221  | 7221  | 0  | 100   |
| <i>SCN1B</i>   | chr19 | 9   | 1066  | 1066  | 0  | 100   |
| <i>SCN2B</i>   | chr11 | 7   | 848   | 848   | 0  | 100   |
| <i>SCN3B</i>   | chr11 | 8   | 898   | 898   | 0  | 100   |
| <i>SCN4B</i>   | chr11 | 7   | 887   | 887   | 0  | 100   |
| <i>SCN5A</i>   | chr3  | 44  | 6423  | 6423  | 0  | 100   |
| <i>SDHA</i>    | chr5  | 19  | 2145  | 2145  | 0  | 100   |
| <i>SGCD</i>    | chr5  | 8   | 1025  | 1025  | 0  | 100   |
| <i>SHOC2</i>   | chr10 | 14  | 1829  | 1829  | 0  | 100   |
| <i>SKI</i>     | chr1  | 18  | 2537  | 2537  | 0  | 100   |
| <i>SLC22A5</i> | chr5  | 14  | 1856  | 1856  | 0  | 100   |
| <i>SLC2A10</i> | chr20 | 14  | 1876  | 1876  | 0  | 100   |
| <i>SLMAP</i>   | chr3  | 33  | 3799  | 3799  | 0  | 100   |
| <i>SMAD1</i>   | chr4  | 12  | 1698  | 1698  | 0  | 100   |
| <i>SMAD2</i>   | chr18 | 13  | 1504  | 1504  | 0  | 100   |
| <i>SMAD3</i>   | chr15 | 14  | 1452  | 1452  | 0  | 100   |

|               |       |     |        |        |      |       |
|---------------|-------|-----|--------|--------|------|-------|
| <i>SMAD4</i>  | chr18 | 18  | 1769   | 1769   | 0    | 100   |
| <i>SMAD9</i>  | chr13 | 13  | 1704   | 1704   | 0    | 100   |
| <i>SNTA1</i>  | chr20 | 17  | 1918   | 1918   | 0    | 100   |
| <i>SOS1</i>   | chr2  | 40  | 4232   | 4232   | 0    | 100   |
| <i>SOS2</i>   | chr14 | 46  | 4919   | 4919   | 0    | 100   |
| <i>SPRED1</i> | chr15 | 13  | 1405   | 1405   | 0    | 100   |
| <i>TAZ</i>    | chrX  | 14  | 1043   | 1043   | 0    | 100   |
| <i>TBX20</i>  | chr7  | 15  | 1748   | 1748   | 0    | 100   |
| <i>TBX4</i>   | chr17 | 16  | 2038   | 2038   | 0    | 100   |
| <i>TBX5</i>   | chr12 | 12  | 1637   | 1637   | 0    | 100   |
| <i>TCAP</i>   | chr17 | 5   | 524    | 524    | 0    | 100   |
| <i>TGFB2</i>  | chr1  | 12  | 1409   | 1409   | 0    | 100   |
| <i>TGFB3</i>  | chr14 | 10  | 1589   | 1589   | 0    | 100   |
| <i>TGFBR1</i> | chr9  | 13  | 1614   | 1614   | 0    | 100   |
| <i>TGFBR2</i> | chr3  | 12  | 1859   | 1859   | 0    | 100   |
| <i>TMEM43</i> | chr3  | 13  | 1323   | 1323   | 0    | 100   |
| <i>TMPO</i>   | chr12 | 25  | 3385   | 3385   | 0    | 100   |
| <i>TNNC1</i>  | chr3  | 7   | 546    | 546    | 0    | 100   |
| <i>TNNI3</i>  | chr19 | 7   | 702    | 702    | 0    | 100   |
| <i>TNNI3K</i> | chr1  | 30  | 3758   | 3710   | 48   | 98.72 |
| <i>TNNT2</i>  | chr1  | 17  | 1081   | 1081   | 0    | 100   |
| <i>TPM1</i>   | chr15 | 15  | 1500   | 1500   | 0    | 100   |
| <i>TRDN</i>   | chr6  | 48  | 4418   | 4418   | 0    | 100   |
| <i>TRPM4</i>  | chr19 | 32  | 3895   | 3895   | 0    | 100   |
| <i>TTN</i>    | chr2  | 800 | 132581 | 129775 | 2806 | 97.88 |
| <i>TTR</i>    | chr18 | 5   | 484    | 484    | 0    | 100   |
| <i>TXNRD2</i> | chr22 | 23  | 2543   | 2543   | 0    | 100   |
| <i>VCL</i>    | chr10 | 36  | 4505   | 4505   | 0    | 100   |
| <i>ZDHHC9</i> | chrX  | 10  | 1545   | 1545   | 0    | 100   |
